# Supplementary material for: Enhancing CO2/N2and CH4/N2separation performance by salt-modified aluminum-based metal–organic frameworks
Source: Royal Society of Chemistry journal article supplement (doi:10.1039/d3dt03993e), 2024-01-01
Supplement: d3dt03993e1.pdf [file d3dt03993e1.pdf]

## Supporting Information

### **Enhancing CO<sub>2</sub>/N<sub>2</sub> and CH<sub>4</sub>/N<sub>2</sub> separation performance by salt-modified aluminum-based metal-organic frameworks**

Peng Zhang, Sai Ma, Yujuan Zhang, Chaohui He\*, Tuoping Hu\*

*Department of Chemistry, College of Chemistry and Chemical Engineering, North*

*University of China, Taiyuan, 030051, Shanxi, P. R. China*

*\*Corresponding authors E-mail: hechaohui0076@163.com; hutuoping@nuc.edu.cn*

### Isosteric heat of adsorption

The adsorption heat for CO<sub>2</sub>, CH<sub>4</sub> and N<sub>2</sub> on MOF-253, MOF-253@Cu(BF<sub>4</sub>)<sub>2</sub>, MOF-253@Zn(BF<sub>4</sub>)<sub>2</sub> and MOF-253@ZnSiF<sub>6</sub> were calculated using the Clausius-Clapeyron equation as follows:

$$Q_{st} = RT^2 \left( \frac{\partial \ln p}{\partial T} \right)_q$$

where  $Q_{st}$  represents the adsorption heat (kJ/mol),  $P$  is the pressure (kPa),  $T$  represents the temperature (K),  $R$  is a constant and  $q$  represents the adsorption amount (mmol/g).

### Ideal adsorbed solution theory (IAST) calculations

The single-component adsorption isotherms of CO<sub>2</sub>, CH<sub>4</sub> and N<sub>2</sub> on MOF-253, MOF-253@Cu(BF<sub>4</sub>)<sub>2</sub>, MOF-253@Zn(BF<sub>4</sub>)<sub>2</sub> and MOF-253@ZnSiF<sub>6</sub> obtained at 298 K were fitted using the dual site Langmuir-Freundlich model.

$$q = q_{A,sat} \frac{b_A P^{\nu_A}}{1 + b_A P^{\nu_A}} + q_{B,sat} \frac{b_B P^{\nu_B}}{1 + b_B P^{\nu_B}}$$

where  $q$  represents the adsorbed capacity per mass of adsorbent (mol/kg),  $q_{A,sat}$  and  $q_{B,sat}$  are the saturation uptake capacities at site A and site B, respectively,  $b_A$  and  $b_B$  represent the constant at adsorption site A and site B, respectively,  $P$  represents the total pressure of the gas at the equilibrium (kPa) and  $\nu$  represents the Freundlich exponent.

The adsorption selectivity defined as follows:

$$S_{ads} = \frac{q_A/q_B}{y_A/y_B}$$

where  $q_A$  and  $q_B$  represent the component molar loading within the MOFs and  $y_A$  and  $y_B$  are the corresponding mole fraction used in the feed gas mixture.

### **Density-functional theory (DFT) calculations**

The binding sites for CO<sub>2</sub> and CH<sub>4</sub> in MOF-253@ZnSiF<sub>6</sub> were identified using DFT calculations. This task is accomplished using the Quantum-Espresso package in Material Studio software. In order to explain the Van der Waals interactions, the dispersive forces (semi-empirical) were added to the traditional DFT in the calculation. The crystal structure of MOF-253@ZnSiF<sub>6</sub> was first optimized and CO<sub>2</sub> or CH<sub>4</sub> were then introduced at different positions in the MOF structure with adequate relaxation.

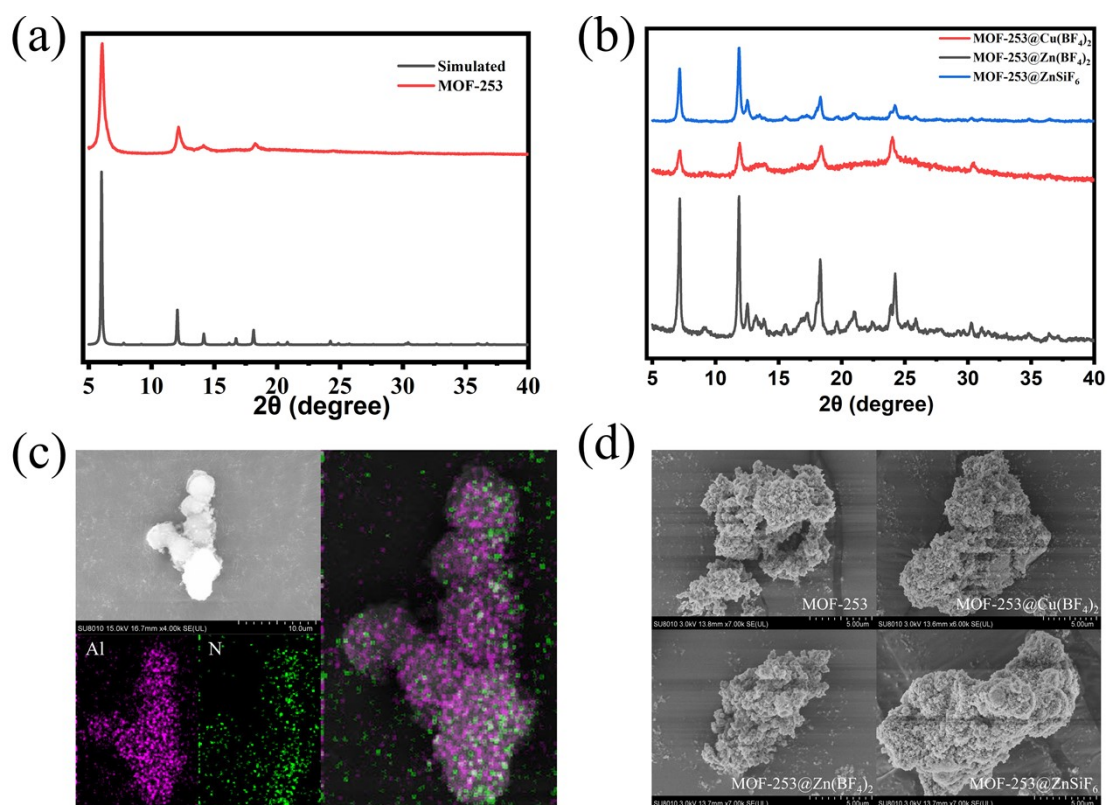

**Fig. S1.** (a) PXRD patterns recorded for MOF-253; (b) PXRD patterns recorded for MOF-253@Cu(BF<sub>4</sub>)<sub>2</sub>, MOF-253@Zn(BF<sub>4</sub>)<sub>2</sub> and MOF-253@ZnSiF<sub>6</sub> (c) SEM and EDS images of MOF-253; (d) SEM images of MOF-253, MOF-253@Cu(BF<sub>4</sub>)<sub>2</sub>, MOF-253@Zn(BF<sub>4</sub>)<sub>2</sub> and MOF-253@ZnSiF<sub>6</sub>.

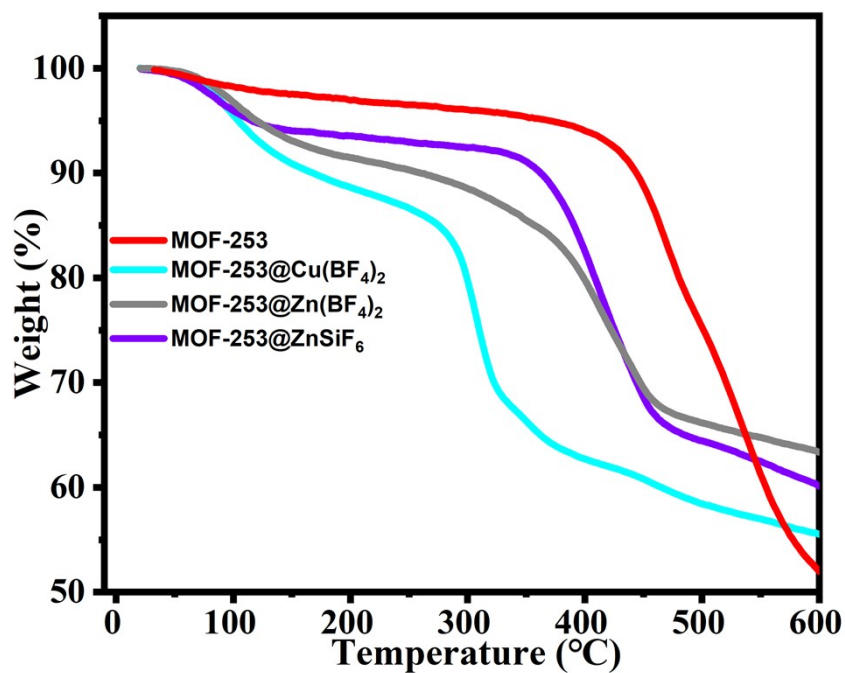

**Fig. S2.** TGA curves of MOF-253, MOF-253@Cu(BF<sub>4</sub>)<sub>2</sub>, MOF-253@Zn(BF<sub>4</sub>)<sub>2</sub> and MOF-253@ZnSiF<sub>6</sub>.

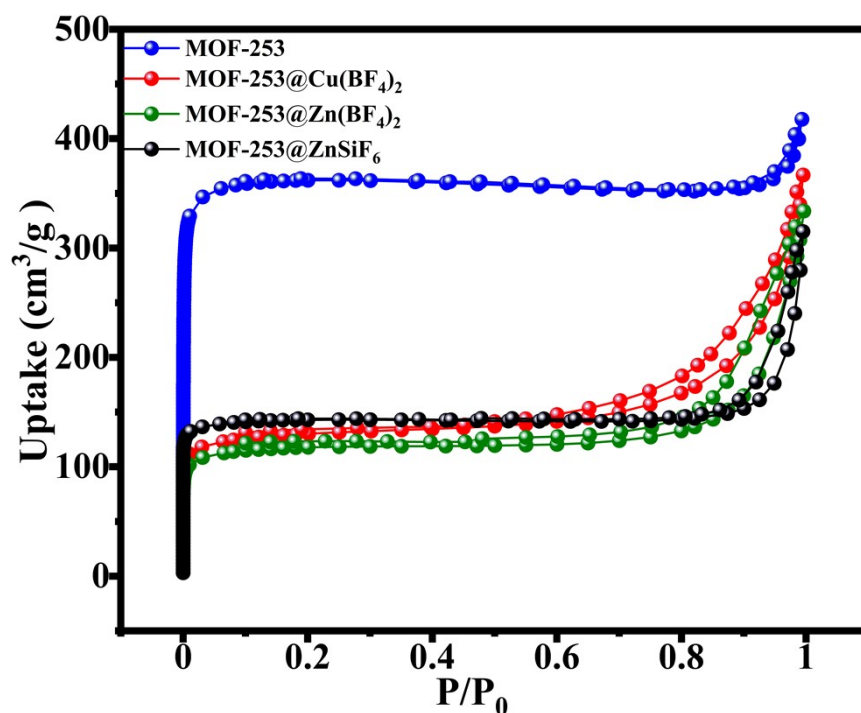

**Fig. S3.** N<sub>2</sub> adsorption-desorption isotherms of MOF-253, MOF-253@Cu(BF<sub>4</sub>)<sub>2</sub>, MOF-253@Zn(BF<sub>4</sub>)<sub>2</sub> and MOF-253@ZnSiF<sub>6</sub> at 77 K.

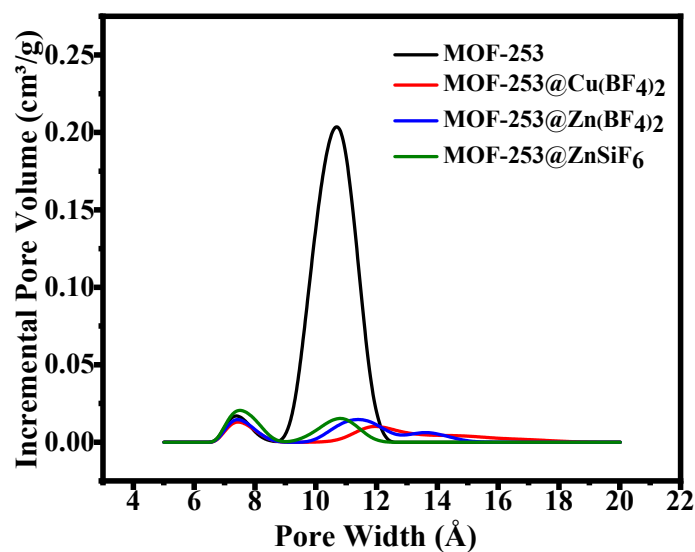

**Fig. S4.** The pore size distributions of MOF-253, MOF-253@Cu(BF<sub>4</sub>)<sub>2</sub>, MOF-253@Zn(BF<sub>4</sub>)<sub>2</sub> and MOF-253@ZnSiF<sub>6</sub> obtained by DFT method.

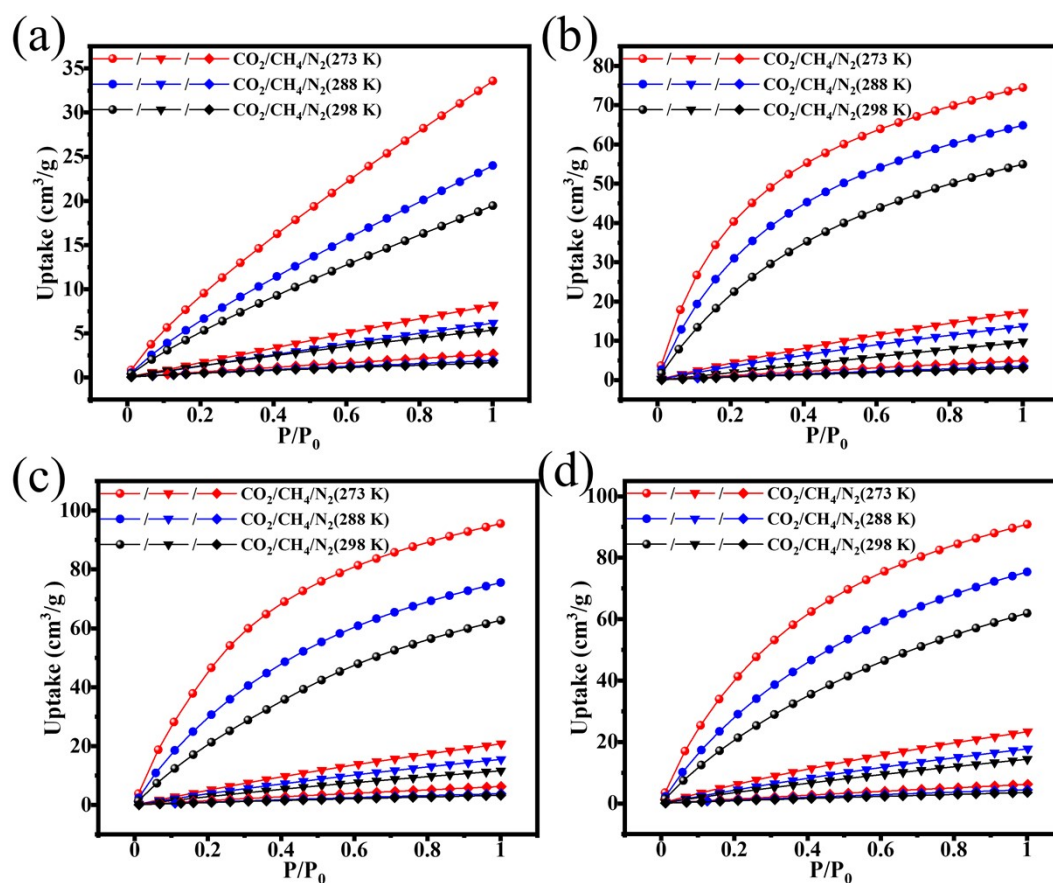

**Fig. S5.** The single-adsorption isotherms of (a) MOF-253, (b) MOF-253@Cu(BF<sub>4</sub>)<sub>2</sub>, (c) MOF-253@Zn(BF<sub>4</sub>)<sub>2</sub> and (d) MOF-253@ZnSiF<sub>6</sub> for CO<sub>2</sub>, CH<sub>4</sub> and N<sub>2</sub> at 273, 288 and 298 K.

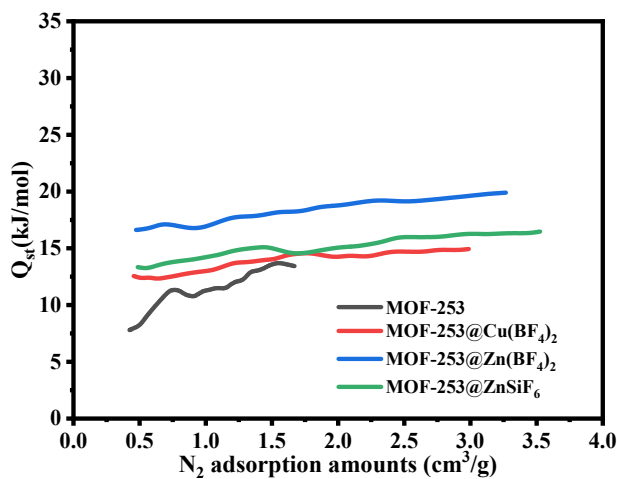

**Fig. S6.** The adsorption heat of MOF-253, MOF-253@Cu(BF<sub>4</sub>)<sub>2</sub>, MOF-253@Zn(BF<sub>4</sub>)<sub>2</sub> and MOF-253@ZnSiF<sub>6</sub> for N<sub>2</sub>.

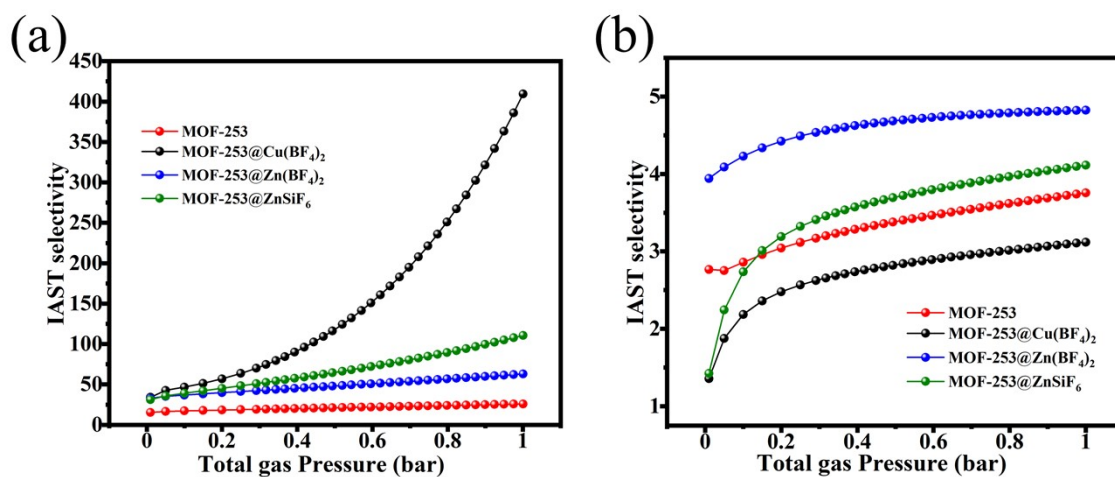

**Fig. S7.** The adsorption selectivity of (a) CO<sub>2</sub>/N<sub>2</sub> (1/1, v/v) and (b) CH<sub>4</sub>/N<sub>2</sub> (1/1, v/v) for MOF-253, MOF-253@Cu(BF<sub>4</sub>)<sub>2</sub>, MOF-253@Zn(BF<sub>4</sub>)<sub>2</sub> and MOF-253@ZnSiF<sub>6</sub> at 298 K.

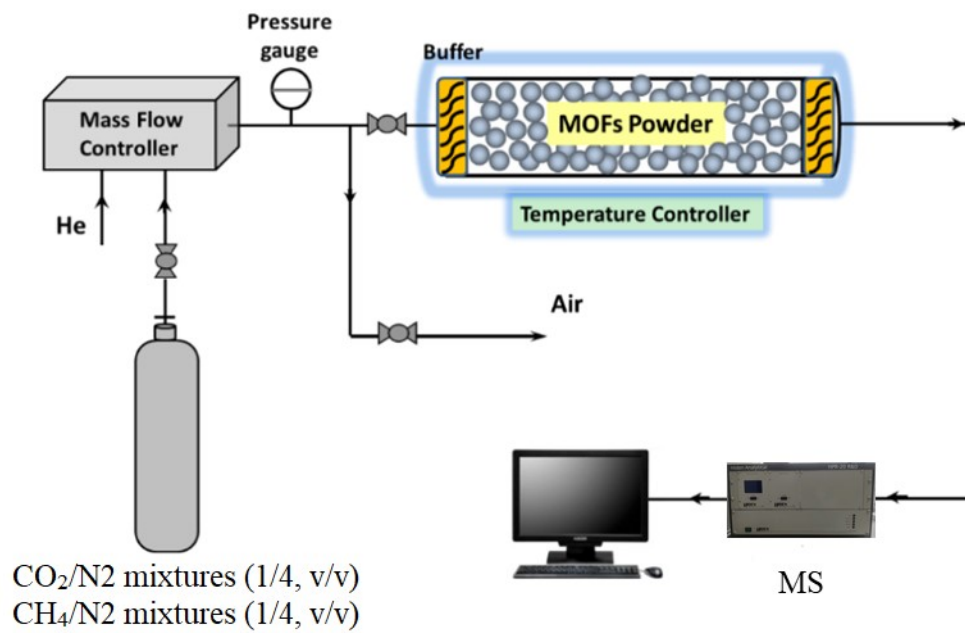

**Fig. S8.** The breakthrough experimental set-up schematic.

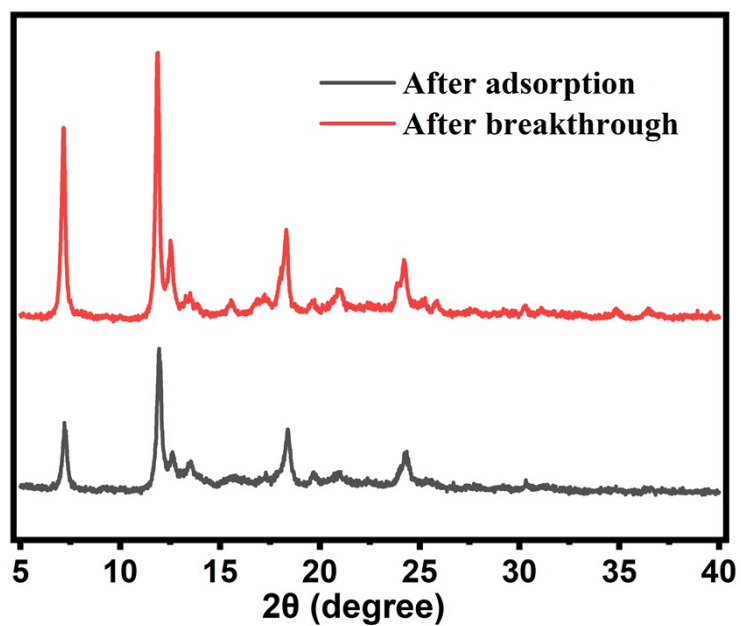

**Fig. S9.** PXRD patterns of MOF-253@ZnSiF<sub>6</sub> treated at different conditions.



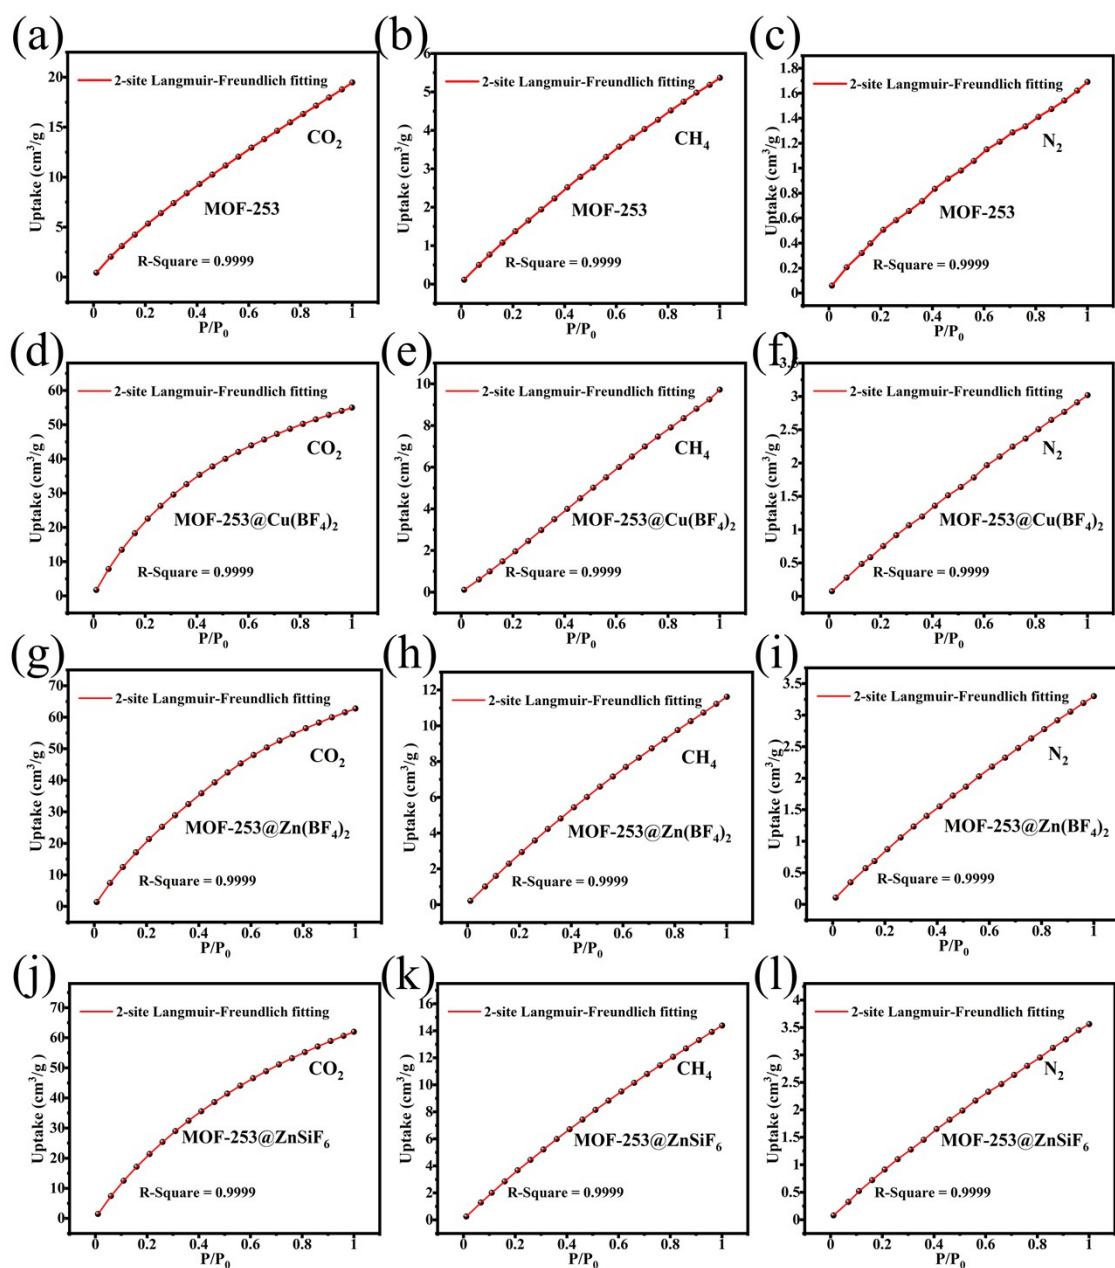

**Fig. S10.** CO<sub>2</sub>, CH<sub>4</sub>, and N<sub>2</sub> adsorption isotherms at 298 K in a series of salt-modified MOF-253 with dual-site Langmuir-Freundlich model fits.

**Table S1** Physicochemical properties of CO<sub>2</sub>, CH<sub>4</sub> and N<sub>2</sub>.

| Structure                                                                                         | Molecular size (Å <sup>3</sup> ) | Kinetic diameter (Å) | Boiling point (K) | Polarizability (×10 <sup>-25</sup> /cm <sup>3</sup> ) | Quadrupole moment (×10 <sup>26</sup> /esu cm <sup>2</sup> ) |
|---------------------------------------------------------------------------------------------------|----------------------------------|----------------------|-------------------|-------------------------------------------------------|-------------------------------------------------------------|
| CO <sub>2</sub> 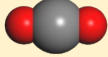 | 3.18 × 3.33 × 5.36               | 3.3                  | 194.7             | 29.11                                                 | -4.30                                                       |
| CH <sub>4</sub>  | 3.7 × 3.7 × 3.7                  | 3.758                | 111.66            | 25.93                                                 | 0                                                           |
| N <sub>2</sub>   | 3.6 × 3.6 × 3.6                  | 3.64                 | 77.35             | 17.403                                                | 1.52                                                        |

**Table S2** EDS element content analysis for MOF-253, MOF-253@Cu(BF<sub>4</sub>)<sub>2</sub>, MOF-253@Zn(BF<sub>4</sub>)<sub>2</sub> and MOF-253@ZnSiF<sub>6</sub>.

| Adsorbents                                | Al (wt.%) | N (wt.%) | Cu (wt.%) | Zn (wt.%) | F (wt.%) |
|-------------------------------------------|-----------|----------|-----------|-----------|----------|
| MOF-253                                   | 53.230    | 46.770   | -         | -         | -        |
| MOF-253@Cu(BF <sub>4</sub> ) <sub>2</sub> | 17.490    | 17.984   | 33.640    | -         | 30.886   |
| MOF-253@Zn(BF <sub>4</sub> ) <sub>2</sub> | 16.523    | 15.768   | -         | 38.332    | 29.377   |
| MOF-253@ZnSiF <sub>6</sub>                | 17.646    | 16.160   | -         | 41.324    | 22.854   |

**Table S3** ICP metals content analysis for MOF-253, MOF-253@Cu(BF<sub>4</sub>)<sub>2</sub>, MOF-253@Zn(BF<sub>4</sub>)<sub>2</sub> and MOF-253@ZnSiF<sub>6</sub>.

| Adsorbents                                | Al<br>(wt.%) | Cu<br>(wt.%) | Zn<br>(wt.%) |
|-------------------------------------------|--------------|--------------|--------------|
| MOF-253                                   | 17.1         | -            | -            |
| MOF-253@Cu(BF <sub>4</sub> ) <sub>2</sub> | 15.7         | 17.7         | -            |
| MOF-253@Zn(BF <sub>4</sub> ) <sub>2</sub> | 13.9         | -            | 12.0         |
| MOF-253@ZnSiF <sub>6</sub>                | 12.8         | -            | 15.7         |

**Table S4** Adsorption capacity of MOF-253@ZnSiF<sub>6</sub> in equilibrium and dynamic conditions.

|                                      | Equilibrium adsorption<br>(1 bar) | Breakthrough experiments<br>(CO <sub>2</sub> /N <sub>2</sub> or CH <sub>4</sub> /N <sub>2</sub> , 1/4) |
|--------------------------------------|-----------------------------------|--------------------------------------------------------------------------------------------------------|
| CO <sub>2</sub> (cm <sup>3</sup> /g) | 61.9                              | 16.1                                                                                                   |
| CH <sub>4</sub> (cm <sup>3</sup> /g) | 14.4                              | 4.2                                                                                                    |

**Table S5** Summary of the equilibrium uptakes, CO<sub>2</sub>/N<sub>2</sub> uptake ratio in some reported MOFs

| Adsorbents                                | CO <sub>2</sub> uptake<br>(cm <sup>3</sup> /g) | N <sub>2</sub> uptake<br>(cm <sup>3</sup> /g) | CO <sub>2</sub> /N <sub>2</sub><br>uptake ratio | Reference |
|-------------------------------------------|------------------------------------------------|-----------------------------------------------|-------------------------------------------------|-----------|
| MOF-253                                   | 19.48                                          | 1.69                                          | 11.5                                            | This work |
| MOF-253@Cu(BF <sub>4</sub> ) <sub>2</sub> | 54.96                                          | 3.02                                          | 18.1                                            | This work |
| MOF-253@Zn(BF <sub>4</sub> ) <sub>2</sub> | 62.7                                           | 3.3                                           | 19                                              | This work |
| MOF-253@ZnSiF <sub>6</sub>                | 61.95                                          | 3.5                                           | 17.7                                            | This work |
| In(aip) <sub>2</sub>                      | 28.1                                           | 0.2                                           | 140.5                                           | [1]       |
| UTSA-280                                  | 67.3                                           | 6                                             | 11.2                                            | [2]       |
| NJUBai35                                  | 72.8                                           | 4                                             | 18.2                                            | [3]       |
| Cu-Fpymo                                  | 39.2                                           | 0.33                                          | 118                                             | [4]       |
| NKMOF-9a                                  | 46.4                                           | 2.2                                           | 21.1                                            | [5]       |
| MUV-26α                                   | 33.15                                          | 0.56                                          | 59.2                                            | [6]       |
| FJUT-3                                    | 51                                             | 5                                             | 10.2                                            | [7]       |
| FJUT-4                                    | 23.5                                           | 1.3                                           | 18.1                                            | [8]       |

**Table S6** Summary of the equilibrium uptakes, CH<sub>4</sub>/N<sub>2</sub> uptake ratio in some reported MOFs

| Adsorbents                                | CH <sub>4</sub> uptake<br>(cm <sup>3</sup> /g) | N <sub>2</sub> uptake<br>(cm <sup>3</sup> /g) | CH <sub>4</sub> /N <sub>2</sub><br>uptake ratio | Reference |
|-------------------------------------------|------------------------------------------------|-----------------------------------------------|-------------------------------------------------|-----------|
| MOF-253                                   | 5.36                                           | 1.69                                          | 3.2                                             | This work |
| MOF-253@Cu(BF <sub>4</sub> ) <sub>2</sub> | 9.72                                           | 3.02                                          | 3.2                                             | This work |
| MOF-253@Zn(BF <sub>4</sub> ) <sub>2</sub> | 11.62                                          | 3.3                                           | 3.5                                             | This work |
| MOF-253@ZnSiF <sub>6</sub>                | 14.39                                          | 3.5                                           | 4.1                                             | This work |
| Al-BPDC                                   | 5.90                                           | 2.70                                          | 2.2                                             | [9]       |
| Al-NDC                                    | 10.86                                          | 3.39                                          | 3.2                                             | [9]       |
| Al-BDC                                    | 15.98                                          | 5.06                                          | 3.1                                             | [9]       |
| Al-FUM-Me                                 | 27.19                                          | 5.18                                          | 5.2                                             | [9]       |
| Al-CDC                                    | 32.1                                           | 5.1                                           | 6.3                                             | [10]      |
| Al-FUM                                    | 20.44                                          | 5.15                                          | 3.9                                             | [11]      |
| MIL-53(Al)                                | 5.21                                           | 4.35                                          | 1.2                                             | [12]      |

**Table S7** Dual-Langmuir-Freundlich fitting parameters for CO<sub>2</sub>, CH<sub>4</sub> and N<sub>2</sub> in MOF-253 at 298 K.

|                 | Site A                          |                   |               | Site B                          |                   |               |
|-----------------|---------------------------------|-------------------|---------------|---------------------------------|-------------------|---------------|
|                 | $q_{A,sat}$                     | $b_A$             | $\nu_A$       | $q_{B,sat}$                     | $b_B$             | $\nu_B$       |
|                 | cm <sup>3</sup> g <sup>-1</sup> | bar <sup>-1</sup> | dimensionless | cm <sup>3</sup> g <sup>-1</sup> | bar <sup>-1</sup> | dimensionless |
| CO <sub>2</sub> | 305.34                          | 0.07              | 0.85          | 0.55                            | 0.47              | 6.60          |
| CH <sub>4</sub> | 24.49                           | 0.26              | 1.05          | 0.26                            | 4.92              | 0.65          |
| N <sub>2</sub>  | 0.04                            | 77.46             | 114.08        | 17.01                           | 0.11              | 0.83          |

**Table S8** Dual-Langmuir-Freundlich fitting parameters for CO<sub>2</sub>, CH<sub>4</sub> and N<sub>2</sub> in MOF-253@Cu(BF<sub>4</sub>)<sub>2</sub> at 298 K.

|                 | Site A                          |                   |               | Site B                          |                   |               |
|-----------------|---------------------------------|-------------------|---------------|---------------------------------|-------------------|---------------|
|                 | $q_{A,sat}$                     | $b_A$             | $\nu_A$       | $q_{B,sat}$                     | $b_B$             | $\nu_B$       |
|                 | cm <sup>3</sup> g <sup>-1</sup> | bar <sup>-1</sup> | dimensionless | cm <sup>3</sup> g <sup>-1</sup> | bar <sup>-1</sup> | dimensionless |
| CO <sub>2</sub> | 0.59                            | 1.15              | 11.03         | 89.03                           | 1.59              | 0.99          |
| CH <sub>4</sub> | 1.48                            | 2.08              | 2.32          | 61.63                           | 0.16              | 1.05          |
| N <sub>2</sub>  | 8.45                            | 0.26              | 1.43          | 3.39                            | 0.59              | 0.77          |

**Table S9** Dual-Langmuir-Freundlich fitting parameters for CO<sub>2</sub>, CH<sub>4</sub> and N<sub>2</sub> in MOF-253@Zn(BF<sub>4</sub>)<sub>2</sub> at 298 K.

|                 | Site A                          |                   |               | Site B                          |                   |               |
|-----------------|---------------------------------|-------------------|---------------|---------------------------------|-------------------|---------------|
|                 | $q_{A,sat}$                     | $b_A$             | $\nu_A$       | $q_{B,sat}$                     | $b_B$             | $\nu_B$       |
|                 | cm <sup>3</sup> g <sup>-1</sup> | bar <sup>-1</sup> | dimensionless | cm <sup>3</sup> g <sup>-1</sup> | bar <sup>-1</sup> | dimensionless |
| CO <sub>2</sub> | 123.76                          | 0.92              | 0.95          | 3.42                            | 93.88             | 6.23          |
| CH <sub>4</sub> | 13.12                           | 0.01              | 11.11         | 60.67                           | 0.23              | 0.97          |
| N <sub>2</sub>  | 23.92                           | 0.16              | 0.90          | 0.09                            | 7.48              | 8.18          |

**Table S10** Dual-Langmuir-Freundlich fitting parameters for CO<sub>2</sub>, CH<sub>4</sub> and N<sub>2</sub> in MOF-253@ZnSiF<sub>6</sub> at 298 K.

|                 | Site A                          |                   |               | Site B                          |                   |               |
|-----------------|---------------------------------|-------------------|---------------|---------------------------------|-------------------|---------------|
|                 | $q_{A,sat}$                     | $b_A$             | $\nu_A$       | $q_{B,sat}$                     | $b_B$             | $\nu_B$       |
|                 | cm <sup>3</sup> g <sup>-1</sup> | bar <sup>-1</sup> | dimensionless | cm <sup>3</sup> g <sup>-1</sup> | bar <sup>-1</sup> | dimensionless |
| CO <sub>2</sub> | 0.65                            | 13.25             | 3.28          | 140.57                          | 0.77              | 0.94          |
| CH <sub>4</sub> | 0.04                            | 20.92             | 28.79         | 95.41                           | 0.18              | 0.95          |
| N <sub>2</sub>  | 0.04                            | 35.56             | 25.30         | 39.09                           | 0.10              | 0.91          |

## References

- [1] Y.-M. Gu, H.-F. Qi, S. Qadir, T.-J. Sun, R. Wei, S.-S. Zhao, X.-W. Liu, Z. Lai, S.-D. Wang, *Chem. Eng. J.*, 2022, **449**, 137768.
- [2] R.-B. Lin, L. Li, A. Alsalmeh, B. Chen, *Small Struct.*, 2020, **1**, 2000022.
- [3] J. Jiang, Z. Lu, M. Zhang, J. Duan, W. Zhang, Y. Pan, J. Bai, *J. Am. Chem. Soc.*, 2018, **140**, 17825-17829.
- [4] Y. Shi, Y. Xie, H. Cui, Z.A. Allothman, O. Alduhaish, R.-B. Lin, B. Chen, *Chem. Eng. J.*, 2022, **446**, 137101.
- [5] S. Geng, H. Xu, C.-S. Cao, T. Pham, B. Zhao, Z. Zhang, *Angew. Chem. Int. Ed.*, 2023, **62**, e202305390.
- [6] I. Abanades Lazaro, E.C. Mazarakioti, E. Andres-Garcia, B.J.C. Vieira, J.C. Waerenborgh, I.J. Vitorica-Yrezabal, M. Gimenez-Marques, G. Minguez Espallargas, *J. Mater. Chem. A*, 2023, **11**, 5320-5327.
- [7] L. Zhang, Z. He, Y. Liu, J. You, L. Lin, J. Jia, S. Chen, N. Hua, L.A. Ma, X. Ye, Y. Liu, C.X. Chen, Q. Wang, *ACS Appl Mater Interfaces*, 2023, **15**, 30394-30401.
- [8] L. Zhang, S. Lin, Y. Liu, X. Zeng, J. You, T. Xiao, Y. Feng, Z. He, S. Chen, N. Hua, X. Ye, Z.-W. Wei, C.-X. Chen, *Inorg. Chem.*, 2023, **62**, 8058-8063.
- [9] M. Chang, T. Yan, Y. Wei, J.-X. Wang, D. Liu, J.-F. Chen, *ACS Appl. Mater. Interfaces*, 2022, **14**, 25374-25384.
- [10] M. Chang, Y. Zhao, D. Liu, J. Yang, J. Li, C. Zhong, *Sustainable Energy Fuels*, 2020, **4**, 138-142.
- [11] H. Zhenghui, H. Peng, L. Jia, S. Fang, Z. Youquan, C. Kungang, Y. Yunpan, K.



Chengjun, Z. Zhaoqiang, J. Hongbing, *Sep. Purif. Technol.*, 2022, **286**, 120446.

[12] A. Pereira, A.F.P. Ferreira, A. Rodrigues, A.M. Ribeiro, M.J. Regufe, *Microporous Mesoporous Mater.*, 2022, **331**, 111648.
